# Supplementary material
Source: HighWire-hosted journal article supplement (https://jitc.bmj.com/content/11/3/e006243)
Supplement: inline-supplementary-material-6 [file inline-supplementary-material-6.xlsx]

## Sheet: TableS2
Table S5. the differentially expressed genes between primary lung adenocarcinoma and brain metastases.
Gene_symbol	baseMean	log2FoldChange	lfcSE	stat	pvalue	adj pvalue	change
BIVM-ERCC5	125.941	-25.2575	3.09677	-8.15608	3.46e-16	1.11e-12	DOWN
AL136295.1	308.667	-14.4073	3.01852	-4.77295	1.82e-06	0.000350888	DOWN
ARL2-SNX15	95.9771	-12.6787	2.65037	-4.78374	1.72e-06	0.000340769	DOWN
DNASE1L3	61.5349	-11.997	2.75151	-4.36014	1.3e-05	0.00157964	DOWN
ISY1-RAB43	745.453	-11.8072	2.97988	-3.96232	7.42e-05	0.00612037	DOWN
PPAN-P2RY11	288.29	-10.8115	2.03277	-5.31863	1.05e-07	3.29e-05	DOWN
TCF21	381.584	-9.61706	1.09002	-8.82282	1.12e-18	5.97e-15	DOWN
TBX5	378.005	-9.58363	1.30919	-7.32029	2.47e-13	3.97e-10	DOWN
BORCS7-ASMT	99.2089	-9.57621	2.09017	-4.58154	4.62e-06	0.000755558	DOWN
SCN7A	1349.59	-9.51605	1.09533	-8.68785	3.69e-18	1.48e-14	DOWN
GZMK	37.9412	-8.84813	2.50271	-3.53542	0.000407129	0.0209332	DOWN
AGTR1	76.4793	-7.96633	1.5855	-5.02449	5.05e-07	0.000122692	DOWN
CCL21	193.472	-7.83764	1.33525	-5.86978	4.36e-09	1.94e-06	DOWN
NUGGC	114.949	-7.2053	1.82728	-3.94318	8.04e-05	0.00649835	DOWN
INMT	647.271	-7.19842	1.20353	-5.98109	2.22e-09	1.15e-06	DOWN
IGLL5	5800.62	-6.9182	0.757414	-9.13398	6.6e-20	5.3e-16	DOWN
DES	158.202	-6.86116	1.81532	-3.77959	0.000157084	0.0103277	DOWN
CTLA4	268.027	-6.84626	1.40501	-4.87274	1.1e-06	0.000229297	DOWN
INMT-MINDY4	345.85	-6.74748	1.37997	-4.8896	1.01e-06	0.000216123	DOWN
JCHAIN	1370.48	-6.67586	0.90906	-7.3437	2.08e-13	3.7e-10	DOWN
RSPO3	76.2796	-6.67247	1.66786	-4.00062	6.32e-05	0.00547833	DOWN
CCL19	125.681	-6.58302	1.30017	-5.06322	4.12e-07	0.000103332	DOWN
BCHE	64.4514	-6.45759	1.90805	-3.38439	0.000713368	0.0305169	DOWN
SEMA3D	127.436	-6.26517	1.88896	-3.31674	0.000910758	0.0358098	DOWN
CNR2	98.5023	-6.26009	1.93076	-3.24229	0.00118574	0.0418058	DOWN
POU2AF1	981.573	-6.25329	1.13497	-5.50967	3.6e-08	1.34e-05	DOWN
PATE2	59.8071	-5.98347	1.87939	-3.18373	0.00145389	0.0477074	DOWN
EIF1AY	169.451	-5.93766	1.39065	-4.26969	1.96e-05	0.00216558	DOWN
HLA-DQA2	219.5	-5.86167	1.46113	-4.01174	6.03e-05	0.00543205	DOWN
LCN10	77.2504	-5.81596	1.78188	-3.26394	0.00109873	0.0396978	DOWN
MS4A4E	137.441	-5.57901	1.48184	-3.76492	0.0001666	0.0108642	DOWN
GALNT17	211.753	-5.56173	1.47587	-3.76843	0.000164277	0.0107565	DOWN
CXCL13	157.308	-5.37613	1.11575	-4.81839	1.45e-06	0.00029388	DOWN
COMP	290.365	-5.32723	1.43725	-3.70655	0.000210104	0.0129315	DOWN
ADH1B	1342.21	-4.98735	1.03648	-4.8118	1.5e-06	0.000299942	DOWN
GSTM5	65.6322	-4.95023	1.21363	-4.07886	4.53e-05	0.00429586	DOWN
GIPC2	98.006	-4.92698	1.12294	-4.38757	1.15e-05	0.00143657	DOWN
FCRL5	1161.45	-4.90384	0.752116	-6.52007	7.03e-11	6.26e-08	DOWN
GREM1	1162.26	-4.78702	1.21749	-3.93187	8.43e-05	0.0066047	DOWN
FMO2	931.876	-4.76582	0.974536	-4.89035	1.01e-06	0.000216123	DOWN
LAX1	285.991	-4.72713	1.19319	-3.96177	7.44e-05	0.00612037	DOWN
LRRC18	68.2991	-4.71486	1.38805	-3.39675	0.000681905	0.0294062	DOWN
BFSP2	58.9621	-4.71064	1.31608	-3.57929	0.000344528	0.0184655	DOWN
SFTPC	7053.84	-4.69045	1.39024	-3.37385	0.000741257	0.0311027	DOWN
ZBTB16	9659.24	-4.63154	0.694374	-6.6701	2.56e-11	2.49e-08	DOWN
TMEM233	85.8053	-4.60863	1.44359	-3.19249	0.00141054	0.0466039	DOWN
CHRDL1	404.051	-4.55577	1.08555	-4.19676	2.71e-05	0.0027349	DOWN
CYP4A11	596.244	-4.54361	1.0146	-4.47824	7.53e-06	0.00103193	DOWN
TIGIT	310.639	-4.52684	1.14165	-3.96515	7.33e-05	0.00612037	DOWN
NOTUM	673.705	-4.40477	1.13141	-3.89316	9.89e-05	0.00741733	DOWN
FXYD2	111.038	-4.29706	1.31042	-3.27914	0.00104123	0.0383986	DOWN
MEI1	329.448	-4.09147	0.94702	-4.32037	1.56e-05	0.00181075	DOWN
DBH	222.77	-4.07072	1.21178	-3.35931	0.000781384	0.0321329	DOWN
SH2D1A	160.287	-4.0391	1.00938	-4.00157	6.29e-05	0.00547833	DOWN
HOXA3	340.446	-4.0046	1.02353	-3.91254	9.13e-05	0.00707791	DOWN
NPR1	600.125	-3.99605	1.15637	-3.4557	0.000548873	0.0253018	DOWN
KCNK3	462.207	-3.86781	0.982848	-3.93531	8.31e-05	0.0066047	DOWN
SFRP2	1030.17	-3.82104	0.829272	-4.60771	4.07e-06	0.000702289	DOWN
ADAMTS8	375.464	-3.81477	0.992985	-3.84172	0.000122177	0.00867244	DOWN
HMCN2	653.822	-3.79786	0.666813	-5.69554	1.23e-08	4.93e-06	DOWN
IGFN1	1012.51	-3.78191	0.547339	-6.90963	4.86e-12	6e-09	DOWN
SCML4	541.009	-3.70269	0.970743	-3.81428	0.000136578	0.00936319	DOWN
TMEM119	866.45	-3.61668	0.756947	-4.77799	1.77e-06	0.000346378	DOWN
IL33	244.635	-3.60819	0.996138	-3.62218	0.00029213	0.0163859	DOWN
CILP	224.763	-3.59359	0.56649	-6.3436	2.24e-10	1.64e-07	DOWN
SGCD	425.065	-3.58931	1.11784	-3.21095	0.00132297	0.044763	DOWN
ZBED2	174.461	-3.5729	1.09632	-3.25901	0.00111802	0.0402135	DOWN
PRDM6	553.027	-3.55302	0.67296	-5.27969	1.29e-07	3.92e-05	DOWN
PLEKHH2	2350.12	-3.53861	0.796516	-4.44261	8.89e-06	0.00117826	DOWN
P2RX1	450.871	-3.48322	0.789159	-4.41384	1.02e-05	0.00132448	DOWN
SLC19A3	195.406	-3.42749	1.01465	-3.37802	0.000730096	0.0309029	DOWN
IL7R	1846.95	-3.42606	0.927767	-3.6928	0.000221802	0.0132683	DOWN
FGF7	333.931	-3.42438	1.07273	-3.19221	0.00141189	0.0466039	DOWN
LRRC15	782.728	-3.41709	0.668982	-5.10789	3.26e-07	8.3e-05	DOWN
RAI2	202.735	-3.39863	0.84842	-4.00584	6.18e-05	0.00547833	DOWN
PGR	268.802	-3.39683	0.911771	-3.72553	0.000194903	0.0122613	DOWN
ZNF683	144.052	-3.39395	1.02921	-3.29762	0.000975067	0.0368842	DOWN
MZB1	696.418	-3.39375	0.49994	-6.78831	1.13e-11	1.3e-08	DOWN
LUM	1738.82	-3.3855	0.795189	-4.25748	2.07e-05	0.00225103	DOWN
MEIS1	1125.92	-3.29824	0.558458	-5.90597	3.51e-09	1.7e-06	DOWN
TPSB2	322.37	-3.29264	0.59309	-5.55167	2.83e-08	1.11e-05	DOWN
ITGBL1	1023.6	-3.28995	0.76404	-4.30599	1.66e-05	0.00190485	DOWN
SLAMF7	665.986	-3.24842	0.804628	-4.03717	5.41e-05	0.00495923	DOWN
FOXF1	315.088	-3.22863	0.939064	-3.43813	0.000585741	0.0265436	DOWN
ROR2	309.845	-3.22167	0.959212	-3.35867	0.000783193	0.0321329	DOWN
CHIT1	343.622	-3.19402	0.788935	-4.04853	5.15e-05	0.00480711	DOWN
ABCA6	951.219	-3.16503	0.645473	-4.90342	9.42e-07	0.000206964	DOWN
CXCL9	471.122	-3.15964	0.455063	-6.9433	3.83e-12	5.59e-09	DOWN
MFAP4	895.272	-3.15426	0.950878	-3.3172	0.000909239	0.0358098	DOWN
CD8A	388.5	-3.09536	0.886553	-3.49146	0.000480394	0.0231827	DOWN
AOC3	1315.51	-3.05497	0.673185	-4.53809	5.68e-06	0.000848846	DOWN
CPXM2	397.505	-3.04619	0.693464	-4.39272	1.12e-05	0.00142521	DOWN
COL6A6	1048.24	-3.01467	0.666144	-4.52555	6.02e-06	0.000870595	DOWN
ELN	4744.09	-3.01131	0.326249	-9.2301	2.7e-20	4.34e-16	DOWN
WISP2	252.023	-3.01039	0.85546	-3.51904	0.000433119	0.0219183	DOWN
FNDC1	1173.6	-2.99255	0.877557	-3.41009	0.000649422	0.0283099	DOWN
THEMIS	216.537	-2.94702	0.819654	-3.59544	0.000323846	0.0177916	DOWN
PDGFRA	1604.64	-2.93931	0.37858	-7.76404	8.23e-15	1.65e-11	DOWN
BCL11B	656.776	-2.93878	0.920344	-3.19313	0.00140741	0.0466039	DOWN
PODN	936.045	-2.93637	0.368924	-7.95929	1.73e-15	3.97e-12	DOWN
RGS1	3368.98	-2.93024	0.888732	-3.2971	0.000976875	0.0368842	DOWN
FIBIN	290.724	-2.92015	0.654939	-4.45865	8.25e-06	0.00112125	DOWN
ZNF831	861.523	-2.8823	0.533954	-5.39802	6.74e-08	2.25e-05	DOWN
LY9	180.066	-2.87472	0.771317	-3.72702	0.000193754	0.012237	DOWN
MEF2B	149.593	-2.85741	0.860224	-3.3217	0.000894718	0.0354415	DOWN
WISP1	761.801	-2.82892	0.53465	-5.29116	1.22e-07	3.75e-05	DOWN
NKD2	1847.7	-2.81316	0.471919	-5.96112	2.51e-09	1.26e-06	DOWN
CD38	790.212	-2.76636	0.6364	-4.34689	1.38e-05	0.00165307	DOWN
RARRES2	801.211	-2.74476	0.411789	-6.66544	2.64e-11	2.49e-08	DOWN
ROBO2	557.223	-2.71447	0.708124	-3.83333	0.000126422	0.00885616	DOWN
PRELP	1944.52	-2.70288	0.43653	-6.19174	5.95e-10	3.67e-07	DOWN
HMCN1	3012.69	-2.69921	0.514147	-5.24988	1.52e-07	4.31e-05	DOWN
ADAMTS15	359.459	-2.61436	0.633533	-4.12664	3.68e-05	0.00364403	DOWN
MMP2	3464.96	-2.57161	0.427912	-6.00967	1.86e-09	9.94e-07	DOWN
CBFA2T3	369.688	-2.56608	0.396517	-6.47156	9.7e-11	7.78e-08	DOWN
TMEM108	721.594	-2.56323	0.547589	-4.68094	2.86e-06	0.000511931	DOWN
GAS1	534.588	-2.55871	0.518083	-4.93881	7.86e-07	0.000177591	DOWN
SVEP1	1262.02	-2.5401	0.435148	-5.83733	5.3e-09	2.3e-06	DOWN
ARRDC5	145.237	-2.53698	0.787934	-3.21978	0.00128287	0.0441627	DOWN
CLDN18	750.665	-2.52459	0.600946	-4.20104	2.66e-05	0.0027349	DOWN
ARHGAP28	334.302	-2.51707	0.698893	-3.6015	0.000316382	0.0174412	DOWN
PLXNA4	488.008	-2.4982	0.549402	-4.54712	5.44e-06	0.000834515	DOWN
PZP	249.365	-2.49518	0.609509	-4.09376	4.24e-05	0.00410165	DOWN
KLHL6	2602.45	-2.47616	0.383998	-6.44835	1.13e-10	8.64e-08	DOWN
ADAM33	374.671	-2.46187	0.418139	-5.88768	3.92e-09	1.85e-06	DOWN
GJB2	354.919	-2.4506	0.643523	-3.8081	0.000140038	0.00951905	DOWN
HECW1	267.918	-2.4428	0.674288	-3.62279	0.000291445	0.0163859	DOWN
FOXO1	2543.48	-2.42116	0.392703	-6.16536	7.03e-10	4.18e-07	DOWN
RYR2	1056.4	-2.41035	0.633533	-3.80462	0.000142024	0.00961331	DOWN
TSC22D3	14460.9	-2.39248	0.369599	-6.47316	9.6e-11	7.78e-08	DOWN
CCBE1	228.285	-2.36444	0.744569	-3.17558	0.00149537	0.0483644	DOWN
ABI3BP	875.483	-2.36395	0.744241	-3.17632	0.00149155	0.0483644	DOWN
HTRA3	961.311	-2.36385	0.38025	-6.21658	5.08e-10	3.26e-07	DOWN
SLFN12L	572.501	-2.35521	0.522544	-4.5072	6.57e-06	0.000908434	DOWN
ADAMTS12	1113.62	-2.33751	0.474156	-4.92983	8.23e-07	0.000183372	DOWN
GRAP2	426.726	-2.33678	0.535045	-4.36745	1.26e-05	0.00156325	DOWN
SCUBE1	266.284	-2.33251	0.529289	-4.40687	1.05e-05	0.0013568	DOWN
GLI2	696.081	-2.31952	0.501102	-4.62884	3.68e-06	0.000641206	DOWN
TENM1	3191.1	-2.28068	0.585266	-3.89683	9.75e-05	0.00734027	DOWN
LYZ	2596.39	-2.27952	0.417408	-5.46113	4.73e-08	1.65e-05	DOWN
ADGRG5	515.877	-2.25878	0.630567	-3.58214	0.000340785	0.0183452	DOWN
KLF9	3263.31	-2.246	0.432685	-5.19085	2.09e-07	5.69e-05	DOWN
DEPP1	6641.53	-2.24305	0.388423	-5.77477	7.71e-09	3.17e-06	DOWN
COL6A3	25353.6	-2.201	0.378782	-5.81072	6.22e-09	2.63e-06	DOWN
SFRP4	818.826	-2.1994	0.419524	-5.2426	1.58e-07	4.38e-05	DOWN
F2RL3	659.119	-2.1488	0.47323	-4.54072	5.61e-06	0.000848452	DOWN
ITGA11	1400.67	-2.13874	0.350917	-6.09472	1.1e-09	6.06e-07	DOWN
SLA	2643.11	-2.12688	0.463031	-4.59339	4.36e-06	0.000738164	DOWN
PRDM1	1482.39	-2.12418	0.469341	-4.52588	6.01e-06	0.000870595	DOWN
FGD2	1978.5	-2.11388	0.433487	-4.87646	1.08e-06	0.000227979	DOWN
DERL3	1376.98	-2.10234	0.564969	-3.72116	0.000198308	0.0123784	DOWN
CXCR4	1896.59	-2.0894	0.598188	-3.49289	0.00047783	0.0231827	DOWN
IKZF1	1988	-2.0894	0.455351	-4.58855	4.46e-06	0.000738164	DOWN
FKBP5	10730.2	-2.07914	0.576799	-3.60462	0.000312613	0.0173421	DOWN
ZBP1	483.392	-2.07787	0.568095	-3.6576	0.000254584	0.0147438	DOWN
PLSCR4	667.576	-2.07601	0.624987	-3.32168	0.000894764	0.0354415	DOWN
CLIC5	629.47	-2.07438	0.656278	-3.16082	0.00157326	0.0496815	DOWN
ADGRD1	3181.45	-2.0668	0.534177	-3.86913	0.000109226	0.00803765	DOWN
OTULINL	1068.76	-2.03912	0.294888	-6.91492	4.68e-12	6e-09	DOWN
CCDC80	2380.07	-2.02854	0.322632	-6.28747	3.23e-10	2.16e-07	DOWN
GPR17	667.986	-2.02626	0.432984	-4.67976	2.87e-06	0.000511931	DOWN
FMOD	738.43	-2.00098	0.454371	-4.40385	1.06e-05	0.00136478	DOWN
IL16	1392.35	-1.98296	0.423375	-4.68369	2.82e-06	0.000511931	DOWN
IFI44L	3665.11	-1.97917	0.532666	-3.71559	0.00020273	0.0126054	DOWN
LCNL1	230.532	-1.97203	0.621689	-3.17205	0.00151366	0.0488218	DOWN
NEGR1	268.335	-1.96341	0.516701	-3.7999	0.000144755	0.00965682	DOWN
AFF3	731.773	-1.94579	0.563886	-3.45068	0.000559185	0.0256299	DOWN
SERPING1	2042.43	-1.9391	0.455829	-4.25402	2.1e-05	0.00225103	DOWN
NBL1	5319.36	-1.91104	0.416396	-4.58947	4.44e-06	0.000738164	DOWN
DLG2	598.164	-1.90917	0.5025	-3.79935	0.000145075	0.00965682	DOWN
TNXB	4274.73	-1.90322	0.471413	-4.03726	5.41e-05	0.00495923	DOWN
GAS7	1946.03	-1.90125	0.448879	-4.23555	2.28e-05	0.00239046	DOWN
PPP1R16B	1210.06	-1.89701	0.556492	-3.40888	0.000652294	0.028358	DOWN
PLXDC2	3604.83	-1.89466	0.481913	-3.93155	8.44e-05	0.0066047	DOWN
PER1	7988.17	-1.89159	0.496246	-3.81181	0.000137954	0.00941728	DOWN
CD6	884.368	-1.88761	0.440255	-4.28754	1.81e-05	0.00204096	DOWN
TMEM200A	237.823	-1.8819	0.527306	-3.5689	0.000358482	0.0189794	DOWN
LIMS2	1351.45	-1.87116	0.420089	-4.45419	8.42e-06	0.00113524	DOWN
POU2F2	792.773	-1.8524	0.549414	-3.37158	0.000747378	0.0311441	DOWN
CD84	2306.97	-1.83821	0.496615	-3.70148	0.000214343	0.0130246	DOWN
LTBP2	8010.69	-1.82687	0.333885	-5.47156	4.46e-08	1.59e-05	DOWN
ZC3H12D	556.924	-1.80267	0.420859	-4.2833	1.84e-05	0.00206569	DOWN
IL2RG	443.618	-1.80085	0.517532	-3.4797	0.000501981	0.0235903	DOWN
AEBP1	9023.66	-1.79972	0.32859	-5.47711	4.32e-08	1.58e-05	DOWN
COL10A1	1082.7	-1.79898	0.481722	-3.73447	0.000188112	0.0120707	DOWN
CYTIP	909.697	-1.79473	0.403333	-4.44975	8.6e-06	0.0011493	DOWN
JAML	1060.14	-1.79354	0.51969	-3.45118	0.00055814	0.0256299	DOWN
CRISPLD2	3389.15	-1.78433	0.539146	-3.30954	0.000934483	0.0359718	DOWN
CYBRD1	2920.17	-1.77937	0.469407	-3.79068	0.000150237	0.00995908	DOWN
CACNA2D2	5379.47	-1.77588	0.439662	-4.03918	5.36e-05	0.00495923	DOWN
FIGN	301.227	-1.76891	0.51599	-3.4282	0.000607606	0.0271797	DOWN
LSAMP	574.4	-1.76404	0.47303	-3.72923	0.000192066	0.0122267	DOWN
HEYL	1657.35	-1.76204	0.352335	-5.00104	5.7e-07	0.000134521	DOWN
GXYLT2	567.61	-1.75547	0.507632	-3.45816	0.000543881	0.0251439	DOWN
ADAM19	2173.94	-1.74696	0.416227	-4.19713	2.7e-05	0.0027349	DOWN
RORA	2680.58	-1.74276	0.450369	-3.86962	0.000109006	0.00803765	DOWN
PRKG1	743.984	-1.74149	0.493758	-3.52702	0.000420272	0.0214714	DOWN
MYH11	3602.42	-1.73311	0.379516	-4.56665	4.96e-06	0.000795019	DOWN
SAMD11	470.955	-1.71605	0.404724	-4.24005	2.23e-05	0.00235845	DOWN
BIRC3	5439.03	-1.70946	0.401016	-4.26281	2.02e-05	0.00221811	DOWN
LINGO3	355.898	-1.70842	0.447138	-3.82078	0.000133031	0.00925224	DOWN
HLF	1276.6	-1.70041	0.476953	-3.56516	0.000363632	0.0190673	DOWN
NAV3	385.116	-1.69986	0.489204	-3.47475	0.000511331	0.0238453	DOWN
PIK3CG	751.771	-1.69961	0.483171	-3.51762	0.000435429	0.0219659	DOWN
XAF1	4681.5	-1.69939	0.453284	-3.74906	0.0001775	0.0115281	DOWN
CYBB	2511.12	-1.69824	0.462415	-3.67255	0.000240147	0.01406	DOWN
GRASP	968.365	-1.6931	0.403416	-4.1969	2.71e-05	0.0027349	DOWN
VGLL3	1043.75	-1.68253	0.426759	-3.94257	8.06e-05	0.00649835	DOWN
ITGAL	1646.19	-1.67649	0.368721	-4.54678	5.45e-06	0.000834515	DOWN
CRTAC1	493.588	-1.67501	0.438436	-3.82041	0.00013323	0.00925224	DOWN
PTGIS	1082.91	-1.66554	0.42601	-3.90964	9.24e-05	0.00708871	DOWN
LMCD1	942.046	-1.64301	0.461754	-3.5582	0.000373407	0.0194487	DOWN
AC009119.2	189.821	-1.63804	0.498286	-3.28735	0.00101136	0.0376431	DOWN
FCGR2B	678.939	-1.63686	0.362883	-4.51073	6.46e-06	0.000901215	DOWN
COL4A4	2026.43	-1.61863	0.508948	-3.18033	0.00147105	0.0479647	DOWN
EPSTI1	926.751	-1.6176	0.402449	-4.01939	5.84e-05	0.00531083	DOWN
SERPINF1	1557.55	-1.61397	0.422886	-3.81656	0.000135324	0.00931701	DOWN
ITGA9	3896.65	-1.61006	0.435604	-3.69616	0.000218881	0.0132003	DOWN
PDZRN3	495.797	-1.60757	0.487584	-3.29702	0.00097717	0.0368842	DOWN
IGFBP5	9238.19	-1.58907	0.298775	-5.31862	1.05e-07	3.29e-05	DOWN
IL10RA	2947.86	-1.57865	0.432984	-3.64598	0.000266373	0.0152612	DOWN
EMILIN1	1940.18	-1.56816	0.333712	-4.69913	2.61e-06	0.000487355	DOWN
CDK14	646.16	-1.56716	0.382671	-4.09531	4.22e-05	0.00409904	DOWN
STARD9	3335.1	-1.56521	0.479954	-3.26118	0.00110951	0.0399971	DOWN
MYLK	3433.51	-1.56118	0.265875	-5.87187	4.31e-09	1.94e-06	DOWN
HAPLN3	633.118	-1.55693	0.340505	-4.57242	4.82e-06	0.000781228	DOWN
GPRIN3	2288.7	-1.54495	0.462967	-3.33705	0.000846716	0.0341282	DOWN
DPYSL3	4993.26	-1.53293	0.243028	-6.30764	2.83e-10	1.98e-07	DOWN
KIF26B	4026.32	-1.52187	0.464601	-3.27564	0.00105423	0.0387002	DOWN
COL8A1	3202.56	-1.5147	0.292952	-5.17047	2.34e-07	6.24e-05	DOWN
GAS6	3537.85	-1.50425	0.331717	-4.53473	5.77e-06	0.000848846	DOWN
DDR2	1919.72	-1.49744	0.401691	-3.72783	0.000193134	0.012237	DOWN
PDK1	1968.69	-1.48627	0.277369	-5.35845	8.39e-08	2.75e-05	DOWN
CTGF	2745.3	-1.4802	0.442857	-3.34239	0.000830611	0.0337333	DOWN
IRF8	933.611	-1.47562	0.38355	-3.84727	0.000119443	0.00855405	DOWN
SELPLG	691.796	-1.47376	0.411815	-3.57869	0.000345321	0.0184655	DOWN
MSRB3	704.251	-1.47086	0.434725	-3.38343	0.00071586	0.0305421	DOWN
AKT3	1361.63	-1.46984	0.452763	-3.24638	0.00116881	0.041391	DOWN
TBX2	3694.1	-1.45803	0.389084	-3.74734	0.000178723	0.0115608	DOWN
POSTN	1968	-1.4453	0.423209	-3.41509	0.000637602	0.0281	DOWN
ANTXR1	2949.96	-1.44098	0.316964	-4.54621	5.46e-06	0.000834515	DOWN
BGN	9410.13	-1.43388	0.29573	-4.84862	1.24e-06	0.000255696	DOWN
CACNA1C	2066.53	-1.43233	0.366333	-3.90991	9.23e-05	0.00708871	DOWN
MXRA5	3149.69	-1.42768	0.328067	-4.3518	1.35e-05	0.00162858	DOWN
IL2RB	863.899	-1.42577	0.39729	-3.58873	0.000332297	0.0180702	DOWN
CCDC69	1988.86	-1.42041	0.353478	-4.01839	5.86e-05	0.00531083	DOWN
ETS1	5047.37	-1.3993	0.364825	-3.83553	0.000125291	0.00884357	DOWN
NEXN	398.083	-1.39545	0.357256	-3.90602	9.38e-05	0.0071001	DOWN
MT1X	1723.66	-1.38788	0.408356	-3.39871	0.000677045	0.0292754	DOWN
COL16A1	4703.02	-1.3718	0.332852	-4.12136	3.77e-05	0.00368426	DOWN
BACH2	355.98	-1.37081	0.387408	-3.5384	0.000402553	0.0207645	DOWN
ZBTB20	2820.77	-1.37064	0.342416	-4.00285	6.26e-05	0.00547833	DOWN
WDFY4	2270.94	-1.35966	0.332464	-4.08964	4.32e-05	0.00415023	DOWN
THBS2	3953.35	-1.34141	0.360456	-3.72142	0.000198107	0.0123784	DOWN
THBS1	14107.7	-1.33656	0.345975	-3.86318	0.00011192	0.00808749	DOWN
PIM2	1615.68	-1.32032	0.412908	-3.19762	0.00138568	0.0460228	DOWN
FBN1	4179.9	-1.31726	0.316023	-4.16824	3.07e-05	0.0030585	DOWN
XYLT1	1664.29	-1.30924	0.317369	-4.12529	3.7e-05	0.00364403	DOWN
AKAP13	36776.2	-1.29426	0.275931	-4.69053	2.73e-06	0.000502465	DOWN
SH3RF3	963.344	-1.28757	0.388988	-3.31006	0.000932764	0.0359718	DOWN
THEMIS2	2801.79	-1.27937	0.345047	-3.70782	0.000209048	0.0129315	DOWN
ARNTL	895.447	-1.2703	0.363151	-3.49799	0.000468786	0.0229277	DOWN
PALLD	3359.81	-1.26658	0.29657	-4.27075	1.95e-05	0.00216558	DOWN
NCKAP1L	1425.97	-1.26583	0.35508	-3.5649	0.000363992	0.0190673	DOWN
KCNAB2	2216.67	-1.25721	0.392229	-3.20529	0.00134925	0.0450971	DOWN
COL12A1	4233.19	-1.25102	0.276992	-4.51644	6.29e-06	0.000888785	DOWN
SIGLEC1	2816.88	-1.24572	0.362231	-3.43901	0.000583848	0.0265328	DOWN
N4BP2L1	637.861	-1.23979	0.37404	-3.31459	0.000917784	0.0358381	DOWN
GFOD1	1627.4	-1.21836	0.335393	-3.63264	0.000280538	0.0159588	DOWN
SCARF2	885.875	-1.20945	0.297819	-4.06102	4.89e-05	0.00458361	DOWN
FBLN1	2726.46	-1.20892	0.345143	-3.50268	0.000460603	0.0227354	DOWN
PARVG	1980.6	-1.19352	0.334664	-3.56631	0.000362036	0.0190673	DOWN
ODF3B	2646.74	-1.18284	0.355288	-3.32924	0.000870839	0.034925	DOWN
ADAMTS2	1837.94	-1.17989	0.296191	-3.98354	6.79e-05	0.00579367	DOWN
CHST11	1566.84	-1.17646	0.337726	-3.48347	0.000494962	0.0234862	DOWN
NTM	548.882	-1.16928	0.341726	-3.42168	0.000622365	0.0276495	DOWN
FAM78A	874.859	-1.16367	0.359186	-3.23974	0.00119639	0.0418802	DOWN
MYH10	4444.8	-1.16074	0.267614	-4.33736	1.44e-05	0.00171357	DOWN
IFFO1	1220.25	-1.16016	0.364206	-3.18544	0.00144532	0.0476096	DOWN
TSPYL2	2077.86	-1.15875	0.220772	-5.24865	1.53e-07	4.31e-05	DOWN
SERPINF2	457.683	-1.15703	0.365645	-3.16434	0.00155436	0.0494744	DOWN
AKNA	7858.62	-1.15306	0.291531	-3.95519	7.65e-05	0.00622745	DOWN
FAT4	2574.96	-1.14731	0.241949	-4.74193	2.12e-06	0.000404286	DOWN
ARL10	802.649	-1.09744	0.308795	-3.55396	0.000379479	0.0196374	DOWN
ADGRE2	846.368	-1.09036	0.317963	-3.42921	0.000605345	0.0271797	DOWN
ARRDC2	2455.32	-1.08015	0.235336	-4.58982	4.44e-06	0.000738164	DOWN
PIK3R1	2986.43	-1.07877	0.324764	-3.3217	0.000894707	0.0354415	DOWN
TBC1D2B	4474.34	-1.07614	0.208933	-5.15064	2.6e-07	6.82e-05	DOWN
AC012651.1	1260.69	-1.07174	0.315028	-3.40205	0.000668832	0.0289984	DOWN
DUOX1	2411.56	-1.06512	0.316095	-3.36962	0.000752707	0.0311937	DOWN
ISLR	999.856	-1.05924	0.293578	-3.60802	0.000308545	0.0171864	DOWN
HACD4	640.439	-1.03413	0.288034	-3.59031	0.000330288	0.018022	DOWN
TOX2	254.683	-1.03304	0.306694	-3.36831	0.000756296	0.0311937	DOWN
WTIP	1872.97	-1.02378	0.314795	-3.25221	0.0011451	0.0408216	DOWN
AXIN2	3926.88	-1.02247	0.321194	-3.18334	0.00145585	0.0477074	DOWN
ACACB	2405.32	-1.02032	0.317719	-3.21139	0.00132093	0.044763	DOWN
CBX7	2792	-1.01936	0.232307	-4.38799	1.14e-05	0.00143657	DOWN
NUDT16	5903.12	-1.01806	0.318342	-3.198	0.00138383	0.0460228	DOWN
NLRC5	9827.13	-1.01513	0.283211	-3.58436	0.000337906	0.0182515	DOWN
ZFP36L2	9057.18	-1.01498	0.222922	-4.55309	5.29e-06	0.000831397	DOWN
ATP2A3	2367.92	-1.01202	0.30494	-3.31874	0.00090423	0.0357282	DOWN
DCHS1	2391.07	-1.00158	0.30828	-3.24894	0.00115834	0.041202	DOWN
MARCKSL1	3637.44	1.00692	0.303899	3.31334	0.000921872	0.0358948	UP
PGM2L1	3364.87	1.01358	0.224465	4.51552	6.32e-06	0.000888785	UP
GALE	1239.65	1.0228	0.240384	4.25488	2.09e-05	0.00225103	UP
DNAJB11	1282.5	1.02558	0.322271	3.18235	0.00146085	0.047729	UP
MAL2	8505.45	1.03119	0.320923	3.21321	0.00131261	0.044763	UP
CDH1	7890.97	1.04403	0.317262	3.29077	0.000999153	0.0373623	UP
CCT3	3091.26	1.07155	0.305142	3.51164	0.000445358	0.0223264	UP
TNFRSF21	5369.9	1.08488	0.305099	3.55582	0.000376797	0.0195617	UP
SPINT2	8244.94	1.08488	0.321556	3.37385	0.000741255	0.0311027	UP
SLC6A8	2071.53	1.08569	0.299435	3.6258	0.000288073	0.0163296	UP
IFFO2	1815.25	1.09146	0.279239	3.9087	9.28e-05	0.00708871	UP
ESRP1	3404.22	1.0954	0.316436	3.46169	0.000536797	0.0249603	UP
YOD1	1271.24	1.10722	0.338367	3.27225	0.00106696	0.0388569	UP
KIF24	549.485	1.12128	0.322026	3.48195	0.000497774	0.0234862	UP
ABCF2	1413.37	1.12131	0.279887	4.00631	6.17e-05	0.00547833	UP
ATG101	674.972	1.14355	0.332196	3.44239	0.000576602	0.026278	UP
NQO1	1089.54	1.14807	0.307231	3.73682	0.000186366	0.0120067	UP
SLC35B2	2191.28	1.1565	0.305619	3.78411	0.000154259	0.0101837	UP
HES1	1041.77	1.15807	0.312669	3.70381	0.000212382	0.0129545	UP
EXPH5	3534.4	1.2093	0.332119	3.64117	0.000271399	0.0154939	UP
NAALADL2	1115.76	1.21884	0.368415	3.30834	0.000938516	0.0359718	UP
CFB	2671.49	1.24313	0.392018	3.1711	0.00151864	0.0488218	UP
PDIA4	6712.05	1.25366	0.340938	3.67708	0.000235918	0.0139139	UP
MPZL2	4244.42	1.26944	0.371945	3.41297	0.000642591	0.0281652	UP
TACSTD2	3747.19	1.32492	0.336568	3.93657	8.27e-05	0.0066047	UP
NAXE	1141.36	1.32719	0.401858	3.30264	0.000957809	0.0364104	UP
FAM84B	8384.84	1.37269	0.393857	3.48524	0.000491688	0.0234752	UP
ASPM	1693	1.39994	0.388455	3.60388	0.000313503	0.0173421	UP
EPHA2	3284.93	1.40308	0.253623	5.53215	3.16e-08	1.21e-05	UP
BDKRB2	827.742	1.45252	0.355669	4.08391	4.43e-05	0.0042286	UP
STRIP2	520.852	1.46315	0.433603	3.37439	0.000739797	0.0311027	UP
IER3	1551.98	1.49324	0.407397	3.66532	0.000247027	0.014358	UP
CENPF	3587.08	1.50405	0.465978	3.22773	0.00124778	0.0432413	UP
SIX4	729.089	1.55013	0.393997	3.93436	8.34e-05	0.0066047	UP
KCNK5	3064.63	1.56503	0.464185	3.37156	0.000747442	0.0311441	UP
SNCG	437.011	1.62018	0.461257	3.51253	0.000443855	0.0223208	UP
TPX2	908.131	1.64047	0.414746	3.95537	7.64e-05	0.00622745	UP
KRT15	1679.13	1.64237	0.430102	3.81855	0.000134237	0.009282	UP
TOP2A	2245.69	1.67184	0.397711	4.20365	2.63e-05	0.0027349	UP
H2AFZ	693.437	1.80143	0.532687	3.38178	0.000720189	0.0305642	UP
ELF3	9973.27	1.8614	0.361587	5.14785	2.63e-07	6.82e-05	UP
SIX1	566.607	1.95894	0.508143	3.85511	0.000115679	0.00832164	UP
CDH3	2370.25	2.04128	0.40457	5.04555	4.52e-07	0.00011161	UP
GCNT3	656.458	2.10389	0.63087	3.3349	0.000853307	0.0343077	UP
IGFBP2	3126.4	2.14152	0.67555	3.17003	0.00152422	0.0489031	UP
SYT13	200.676	2.16515	0.569436	3.80227	0.000143374	0.00963208	UP
ANLN	1478.37	2.18831	0.404583	5.40881	6.34e-08	2.17e-05	UP
AGR2	2037	2.5313	0.742017	3.41138	0.000646356	0.028253	UP
BCAS1	459.681	2.81514	0.808311	3.48274	0.000496303	0.0234862	UP
SOX2	206.987	2.84663	0.808555	3.52064	0.000430512	0.0219183	UP
FJX1	337.383	2.96133	0.707638	4.1848	2.85e-05	0.00286163	UP
TSPAN1	791.685	3.18707	0.911801	3.49535	0.000473433	0.0230845	UP
DEPDC1	285.583	3.37985	0.87949	3.84297	0.000121555	0.00866662	UP
ACHE	1627.89	3.43792	0.979759	3.50895	0.000449887	0.0224379	UP
TBX18	132.374	3.69254	1.09614	3.36867	0.000755326	0.0311937	UP
DKK1	969.759	3.7475	1.01178	3.70386	0.000212347	0.0129545	UP
MSX1	68.0932	3.74943	1.09741	3.41662	0.00063404	0.02802	UP
ADORA1	807.339	3.87805	0.986134	3.93257	8.4e-05	0.0066047	UP
TMEM59L	380.072	3.89467	1.18451	3.28799	0.00100904	0.0376431	UP
KIF1A	1881.2	3.9424	0.929698	4.24051	2.23e-05	0.00235845	UP
FGA	941.626	4.02465	1.21827	3.30357	0.000954619	0.0363753	UP
B4GALNT4	633.767	4.06191	1.23966	3.27663	0.00105053	0.0386527	UP
OLIG1	50.1909	4.2301	1.2167	3.4767	0.000507625	0.0237415	UP
NTRK2	352.682	4.24885	1.20209	3.53455	0.000408465	0.0209348	UP
AK5	38.8306	4.26688	1.30599	3.26717	0.0010863	0.0393372	UP
VPS37D	156.982	4.27591	1.33596	3.20062	0.00137132	0.0457352	UP
ANKHD1-EIF4EBP3	1803.2	4.28177	0.948037	4.51646	6.29e-06	0.000888785	UP
GCAT	293.779	4.30777	1.16838	3.68698	0.000226934	0.0134833	UP
EFNA4	423.281	4.42469	1.37667	3.21405	0.00130876	0.044763	UP
PTPRH	318.88	4.45528	1.23133	3.61826	0.000296593	0.0165782	UP
GNAZ	144.122	4.46895	1.34502	3.3226	0.00089184	0.0354415	UP
E2F8	175.325	4.52296	1.36577	3.31166	0.000927429	0.0359718	UP
L1CAM	563.677	4.52711	1.0381	4.36094	1.3e-05	0.00157964	UP
CACNA1A	185.051	4.6084	1.18845	3.87765	0.00010547	0.00783313	UP
CLSPN	304.523	4.74772	1.39108	3.41298	0.000642577	0.0281652	UP
AS3MT	89.0954	4.751	1.46001	3.25409	0.00113757	0.0406434	UP
ZIC4	51.098	4.77827	1.41861	3.36827	0.000756412	0.0311937	UP
PARPBP	136.625	4.80659	1.44968	3.31563	0.000914353	0.0358381	UP
GRIK3	228.809	4.82102	1.14882	4.1965	2.71e-05	0.0027349	UP
FMN2	61.138	4.89583	1.32503	3.69487	0.000220001	0.0132182	UP
CCNB1	253.489	4.92398	1.48901	3.30688	0.00094342	0.0360341	UP
DLGAP5	255.437	4.98113	1.34916	3.69201	0.000222489	0.0132683	UP
LSMEM1	130.762	5.07234	1.49987	3.38184	0.000720018	0.0305642	UP
FAM131C	87.5651	5.0997	1.45482	3.50539	0.000455947	0.022575	UP
FAIM2	78.2521	5.17323	1.50961	3.42686	0.000610601	0.0272091	UP
ESCO2	96.4512	5.17601	1.3388	3.86616	0.000110562	0.00808749	UP
ABCA12	692.009	5.17847	1.29301	4.00496	6.2e-05	0.00547833	UP
KCNK2	72.455	5.26657	1.63169	3.22767	0.00124802	0.0432413	UP
ZIC2	71.931	5.409	1.51348	3.57389	0.000351716	0.0187151	UP
GGTLC2	62.5545	5.49346	1.6421	3.34538	0.000821702	0.0334562	UP
NRCAM	239.837	5.604	1.46137	3.83475	0.000125691	0.00884357	UP
CASKIN1	290.459	5.66542	1.2017	4.71449	2.42e-06	0.000457318	UP
NCCRP1	110.227	5.76422	1.64407	3.50606	0.000454791	0.022575	UP
KDELC1	62.6639	5.79693	1.68726	3.4357	0.000591022	0.0267075	UP
ZIC5	43.9991	6.1624	1.70067	3.62351	0.000290634	0.0163859	UP
MBLAC1	63.3632	6.18167	1.73435	3.56425	0.000364896	0.0190673	UP
TUBB4A	212.063	6.21873	1.60907	3.8648	0.000111181	0.00808749	UP
CAMK2B	110.092	6.26093	1.54072	4.06365	4.83e-05	0.00455892	UP
PLP1	555.942	6.38838	1.27917	4.99415	5.91e-07	0.00013739	UP
GFAP	3964.16	6.67284	1.50473	4.43459	9.22e-06	0.00121297	UP
C1QL1	59.1718	6.97306	1.41123	4.94113	7.77e-07	0.000177591	UP
GPR37	112.889	7.07605	1.55223	4.55862	5.15e-06	0.000817825	UP
PMP2	123.752	7.19124	2.0537	3.5016	0.00046247	0.0227575	UP
GABBR2	174.207	7.54866	1.89247	3.98879	6.64e-05	0.00572779	UP
ZIC1	176.74	7.59513	0.953214	7.96792	1.61e-15	3.97e-12	UP
NYAP1	63.0353	7.93953	2.21034	3.59199	0.00032816	0.0179671	UP
DPYSL5	53.2496	7.9795	2.28738	3.4885	0.000485744	0.0232606	UP
PTPRZ1	577.986	8.27335	1.35325	6.11367	9.74e-10	5.58e-07	UP
GUCY2C	83.3076	8.59157	2.46941	3.47919	0.000502923	0.0235903	UP
SLC6A13	23.0905	9.77628	3.01942	3.2378	0.00120453	0.0420068	UP
AC008878.3	43.6443	9.797	3.01855	3.2456	0.00117203	0.0414134	UP
RBM24	34.6085	9.83208	3.0188	3.25695	0.00112618	0.0403261	UP
TMEM235	21.6664	9.93372	3.00244	3.30854	0.000937828	0.0359718	UP
CXCR1	94.4021	10.1699	2.33126	4.36242	1.29e-05	0.00157964	UP
SERPINB3	237.459	19.4522	2.88435	6.74404	1.54e-11	1.65e-08	UP
