# Supplementary material
Source: HighWire-hosted journal article supplement (https://jitc.bmj.com/content/11/3/e006243)
Supplement: inline-supplementary-material-7 [file inline-supplementary-material-7.pdf]

## Brain metastases vs Primary LUAD - Hallmark

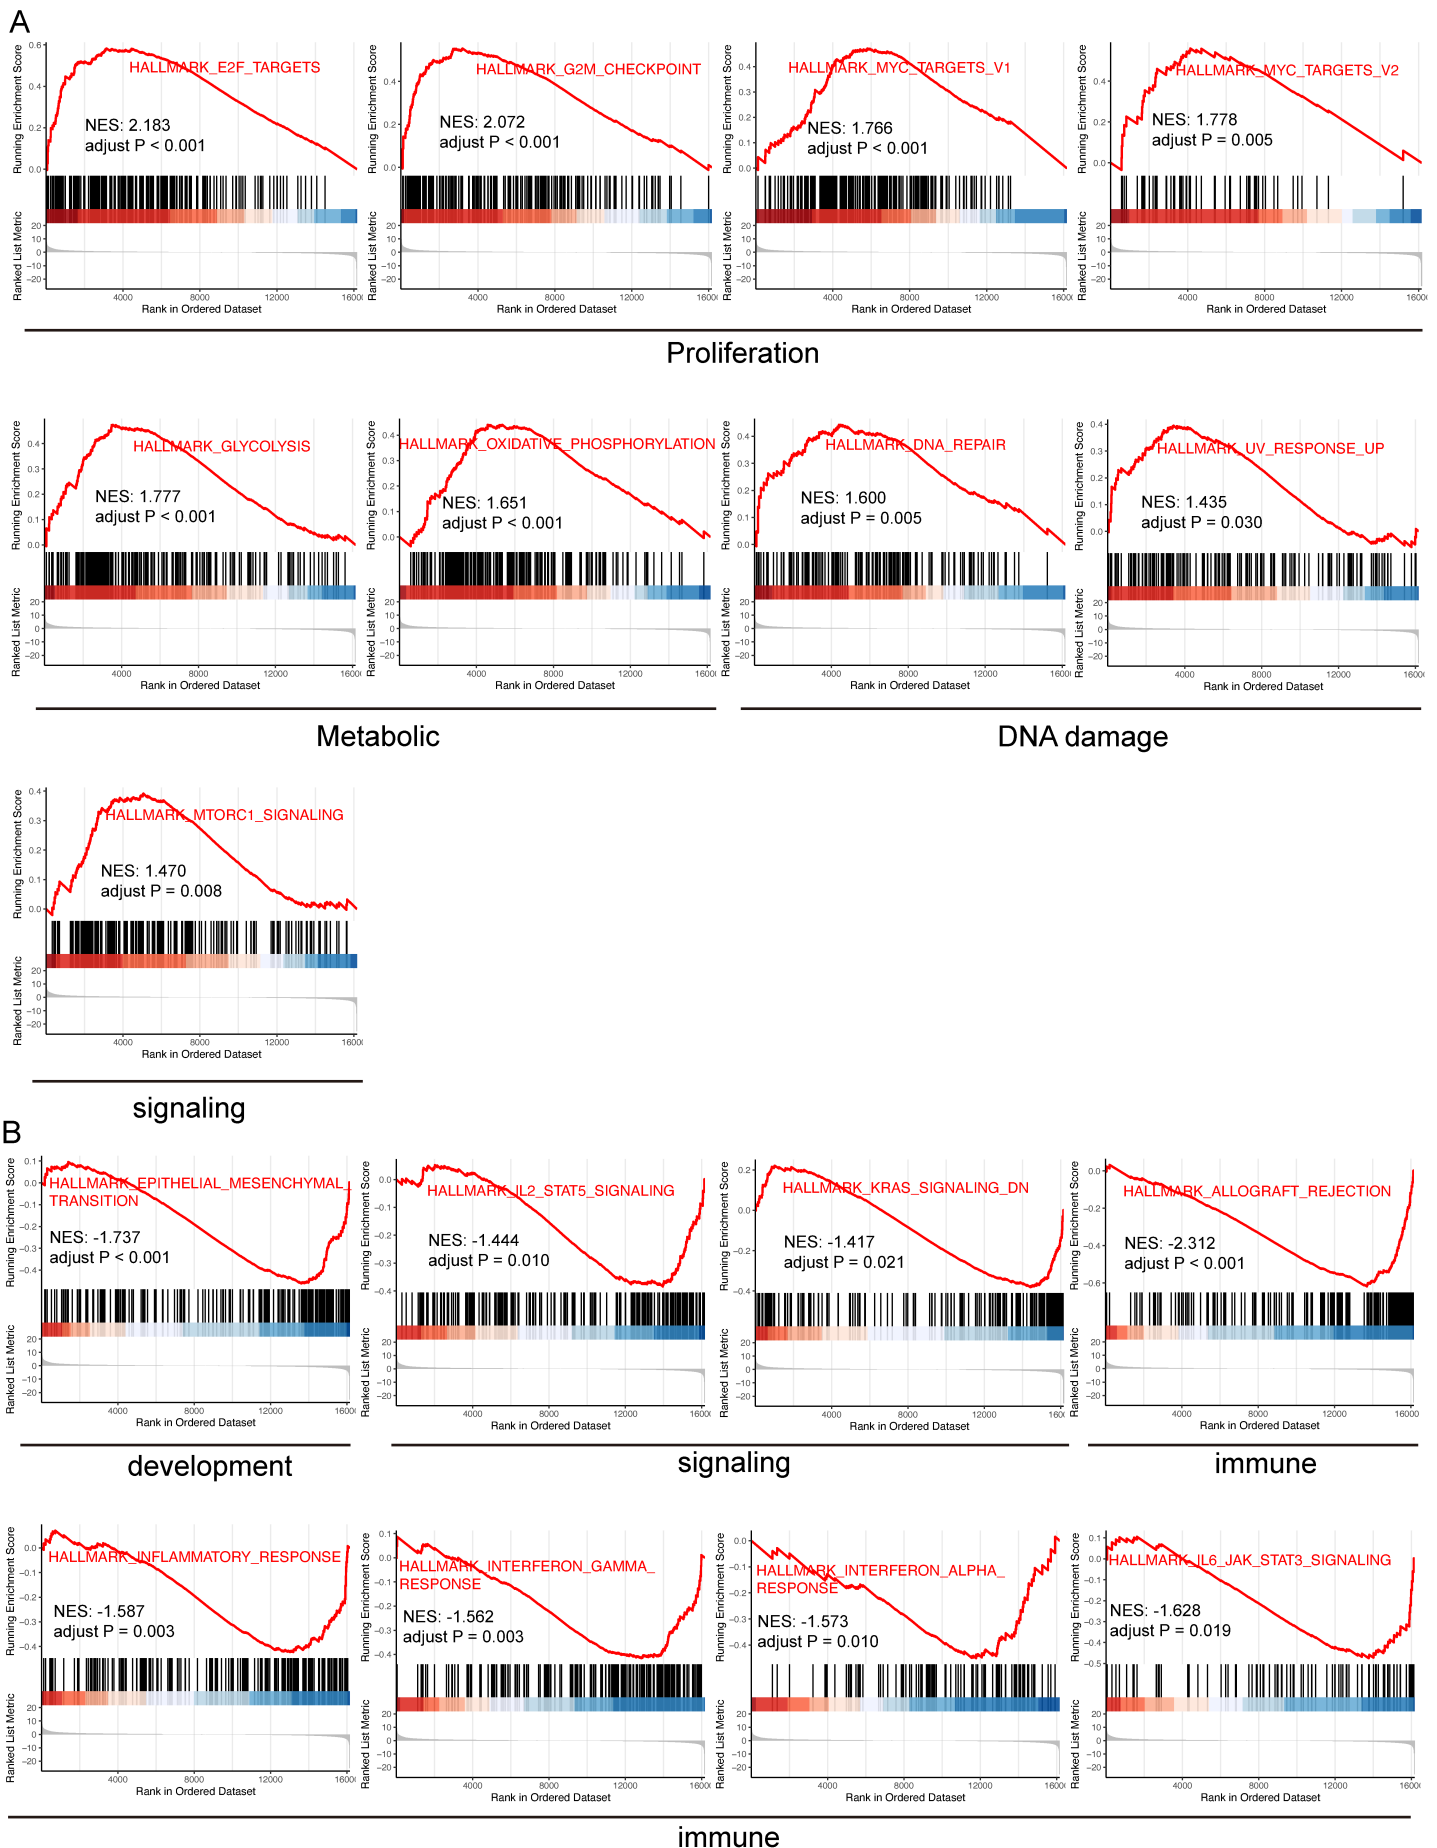

Figure S2. GSEA based on hallmark gene sets between brain metastases and primary LUAD. **A**. GSEA of brain metastases using hallmark gene sets; **B**. GSEA of primary LUAD using hallmark gene sets.
