# Supplementary material
Source: HighWire-hosted journal article supplement (https://jitc.bmj.com/content/11/3/e006243)
Supplement: inline-supplementary-material-16 [file inline-supplementary-material-16.pdf]

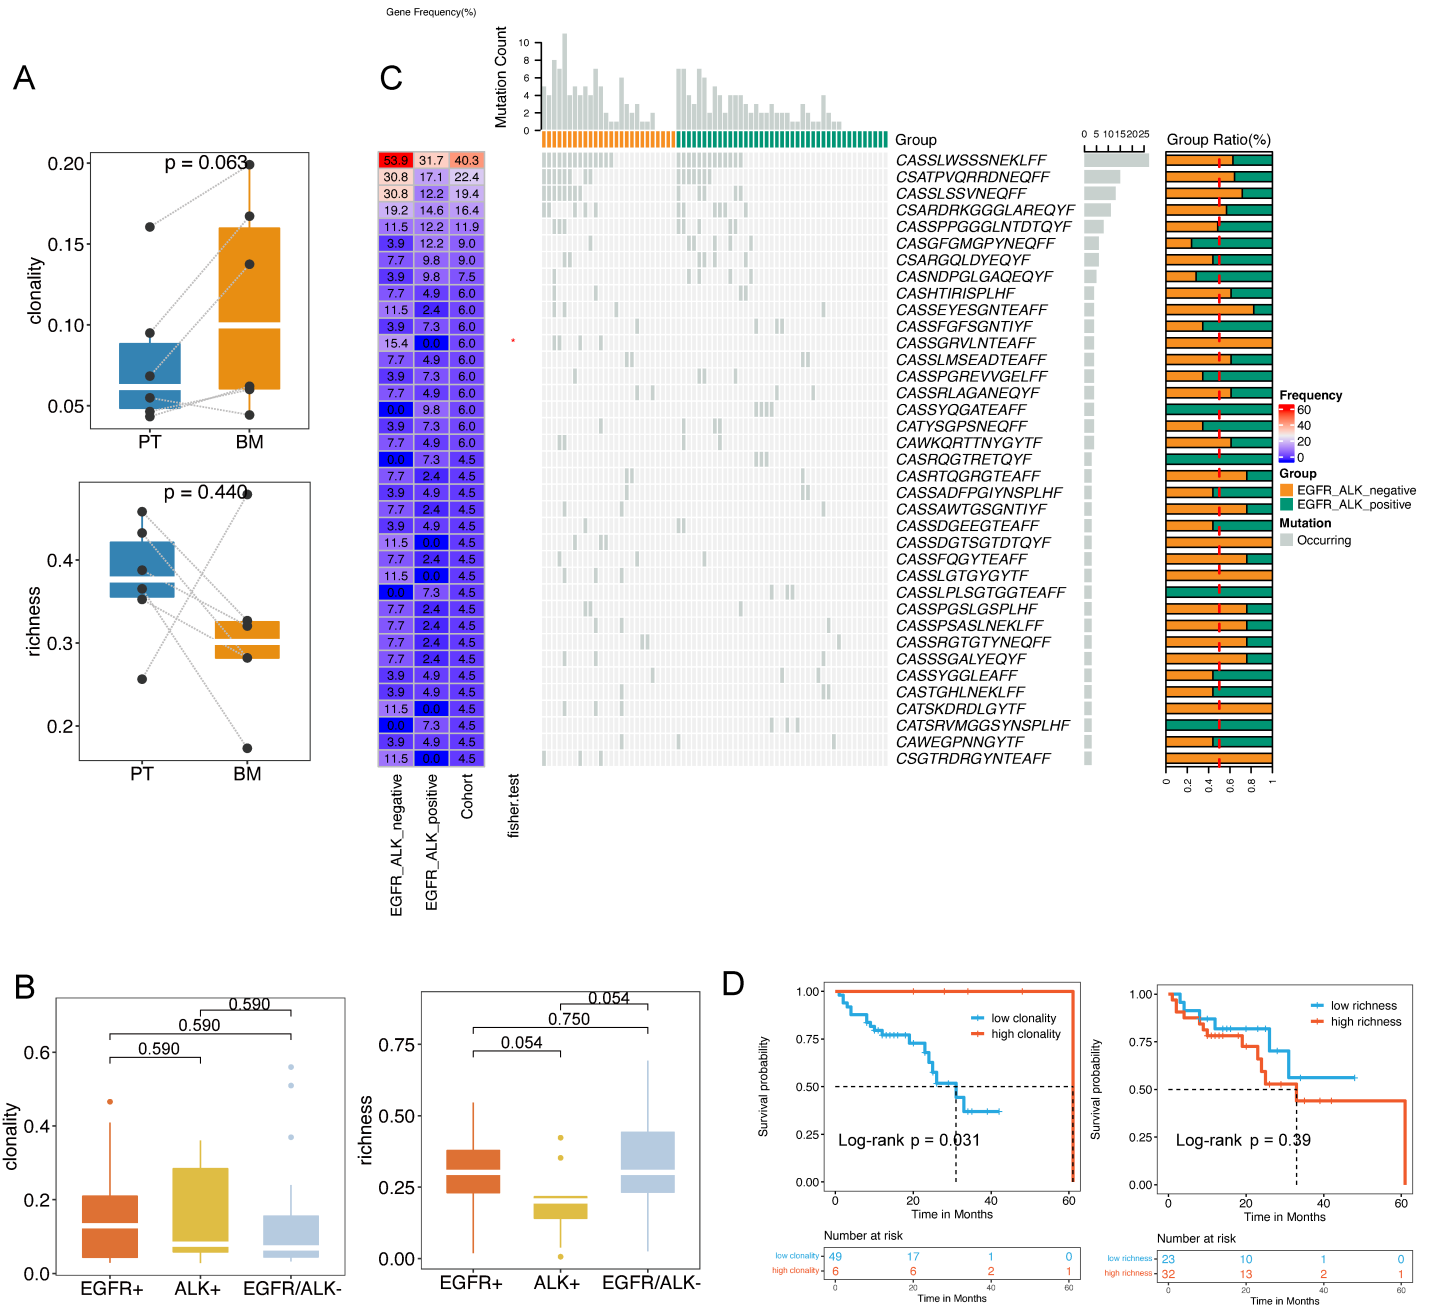

Figure S11. the TCR repertoire in LUAD BMs.

**A.** Comparison of TCR repertoire (clonality and richness) between PT and paired BM;

**B.** Comparison of the clonality and richness between EGFR-positive, ALK-positive and EGFR/ALK-negative; The P values were corrected by the FDR method.

**C.** The heatmap shows the CDR3 between EGFR/ALK-negative and EGFR/ALK-positive.

**D.** The prognostic significance of the clonality and richness was evaluated using Kaplan-Meier plots (log-rank test). The optimal cutoffs were used to define high/low value by survminer R package.
